# Supplementary material
Source: HighWire-hosted journal article supplement (https://www.cmajopen.ca/highwire/filestream/85281/field_highwire_adjunct_files/0/2020-0201-1-at.pdf)
Supplement: 2020-0201-1-at.pdf [file 2020-0201-1-at.pdf]

**Table S1. Method to calculate positive and negative percent agreement.**

| Data source       | ORGD death            |                      |   |
|-------------------|-----------------------|----------------------|---|
|                   | <i>Record Present</i> | <i>Record Absent</i> |   |
| <b>CIHI death</b> | <i>Record Present</i> | a                    | b |
|                   | <i>Record Absent</i>  | c                    | d |

Overall percent agreement =  $(a + d)/(a + b + c + d)$ .

However, the overall percent does not differentiate between the agreement on the positives and agreement on the negatives. Hence, it is often recommended that one report positive percent agreement (PPA) and negative percent agreement (NPA) when there is an imperfect reference standard (in this case, the ORGD).

$$PPA = a/(a + c)$$

$$NPA = d/(b + d)$$

**Table S2. Any cause of death ≤ 42 days of delivery among women who had a livebirth or stillbirth in CIHI and a death record in ORGD.** Cause of death is ranked according to the 3-digit ICD-10 code (4-digits for amniotic fluid embolism). Each case may have had more one cause of death, so the total count may exceed the number of cases. Suppression is required at 5 or fewer counts.

| ICD-10 code | Label                                                                                                                       | Number     | %          |
|-------------|-----------------------------------------------------------------------------------------------------------------------------|------------|------------|
| O99         | Other maternal diseases classifiable elsewhere but complicating pregnancy, childbirth and the puerperium                    | 74         | 15.4       |
| O75         | Other complications of labour and delivery, not elsewhere classified                                                        | 66         | 13.7       |
| O881        | Amniotic fluid embolism                                                                                                     | 23         | 4.8        |
| O14         | Gestational [pregnancy-induced] hypertension with significant proteinuria                                                   | 20         | 4.3        |
| O26         | Maternal care for other conditions predominantly related to pregnancy                                                       | 20         | 4.3        |
| O72         | Postpartum haemorrhage                                                                                                      | 14         | 3.0        |
| O90         | Complications of the puerperium, not elsewhere classified                                                                   | 14         | 3.0        |
| O96*        | Death from any obstetric cause occurring more than 42 days but less than one year after delivery                            | 14         | 3.0        |
| O882        | Obstetric blood-clot embolism                                                                                               | 11         | 2.3        |
| O16         | Unspecified maternal hypertension                                                                                           | 9          | 1.9        |
| O85         | Puerperal sepsis                                                                                                            | 9          | 1.9        |
| O45         | Premature separation of placenta [abruptio placentae]                                                                       | 8          | 1.7        |
| O22         | Venous complications in pregnancy                                                                                           | 7          | 1.5        |
| O95         | Obstetric death of unspecified cause                                                                                        | 7          | 1.5        |
| O98         | Maternal infectious and parasitic diseases classifiable elsewhere but complicating pregnancy, childbirth and the puerperium | 7          | 1.5        |
| C80         | Malignant neoplasm without specification of site                                                                            | 6          | 1.3        |
| I61         | Intracerebral haemorrhage                                                                                                   | 6          | 1.3        |
| I60         | Subarachnoid haemorrhage                                                                                                    | Suppressed | Suppressed |
| O46         | Antepartum haemorrhage, not elsewhere classified                                                                            | Suppressed | Suppressed |
| O86         | Other puerperal infections                                                                                                  | Suppressed | Suppressed |
| C50         | Malignant neoplasm of breast                                                                                                | Suppressed | Suppressed |
| O36         | Maternal care for other known or suspected fetal problems                                                                   | Suppressed | Suppressed |
| T40         | Poisoning by narcotics and psychodysleptics [hallucinogens]                                                                 | Suppressed | Suppressed |
| T51         | Toxic effect of alcohol                                                                                                     | Suppressed | Suppressed |
| V89         | Motor- or nonmotor-vehicle accident, type of vehicle unspecified                                                            | Suppressed | Suppressed |
| X45         | Accidental poisoning by and exposure to alcohol                                                                             | Suppressed | Suppressed |
| X70         | Intentional self-harm by hanging, strangulation and suffocation                                                             | Suppressed | Suppressed |
| C16         | Malignant neoplasm of stomach                                                                                               | Suppressed | Suppressed |
| I67         | Other cerebrovascular diseases                                                                                              | Suppressed | Suppressed |
| O13         | Gestational [pregnancy-induced] hypertension without significant proteinuria                                                | Suppressed | Suppressed |
| O44         | Placenta praevia                                                                                                            | Suppressed | Suppressed |
| O68         | Labour and delivery complicated by fetal stress [distress]                                                                  | Suppressed | Suppressed |
| T71         | Asphyxiation                                                                                                                | Suppressed | Suppressed |

| ICD-10 code | Label                                                                                                                      | Number     | %          |
|-------------|----------------------------------------------------------------------------------------------------------------------------|------------|------------|
| X44         | Accidental poisoning by and exposure to other and unspecified drugs, medicaments and biological substances                 | Suppressed | Suppressed |
| C22         | Malignant neoplasm of liver and intrahepatic bile ducts                                                                    | Suppressed | Suppressed |
| C25         | Malignant neoplasm of pancreas                                                                                             | Suppressed | Suppressed |
| D68         | Other coagulation defects                                                                                                  | Suppressed | Suppressed |
| G00         | Bacterial meningitis, not elsewhere classified                                                                             | Suppressed | Suppressed |
| G93         | Other disorders of brain                                                                                                   | Suppressed | Suppressed |
| I27         | Other pulmonary heart diseases                                                                                             | Suppressed | Suppressed |
| I40         | Acute myocarditis                                                                                                          | Suppressed | Suppressed |
| I64         | Stroke, not specified as haemorrhage or infarction                                                                         | Suppressed | Suppressed |
| N19         | Unspecified renal failure                                                                                                  | Suppressed | Suppressed |
| O10         | Pre-existing hypertension complicating pregnancy, childbirth and the puerperium                                            | Suppressed | Suppressed |
| O24         | Diabetes mellitus in pregnancy                                                                                             | Suppressed | Suppressed |
| O30         | Multiple gestation                                                                                                         | Suppressed | Suppressed |
| O32         | Maternal care for known or suspected malpresentation of fetus                                                              | Suppressed | Suppressed |
| O34         | Maternal care for known or suspected abnormality of pelvic organs                                                          | Suppressed | Suppressed |
| O41         | Other disorders of amniotic fluid and membranes                                                                            | Suppressed | Suppressed |
| O42         | Premature rupture of membranes                                                                                             | Suppressed | Suppressed |
| O69         | Labour and delivery complicated by umbilical cord complications                                                            | Suppressed | Suppressed |
| O71         | Other obstetric trauma                                                                                                     | Suppressed | Suppressed |
| O87         | Venous complications in the puerperium                                                                                     | Suppressed | Suppressed |
| Q23         | Congenital malformations of aortic and mitral valves                                                                       | Suppressed | Suppressed |
| R97         | R97                                                                                                                        | Suppressed | Suppressed |
| S09         | Other and unspecified injuries of head                                                                                     | Suppressed | Suppressed |
| S29         | Other and unspecified injuries of thorax                                                                                   | Suppressed | Suppressed |
| T07         | Unspecified multiple injuries                                                                                              | Suppressed | Suppressed |
| V48         | Car occupant injured in noncollision transport accident                                                                    | Suppressed | Suppressed |
| V87         | Traffic accident of specified type but victim's mode of transport unknown                                                  | Suppressed | Suppressed |
| X42         | Accidental poisoning by and exposure to narcotics and psychodysleptics [hallucinogens], not elsewhere classified           | Suppressed | Suppressed |
| X99         | Assault by sharp object                                                                                                    | Suppressed | Suppressed |
| Y00         | Assault by blunt object                                                                                                    | Suppressed | Suppressed |
| Y12         | Poisoning by and exposure to narcotics and psychodysleptics [hallucinogens], not elsewhere classified, undetermined intent | Suppressed | Suppressed |
| A41         | Other septicaemia                                                                                                          | Suppressed | Suppressed |
| B18         | Chronic viral hepatitis                                                                                                    | Suppressed | Suppressed |
| C18         | Malignant neoplasm of colon                                                                                                | Suppressed | Suppressed |
| E66         | Obesity                                                                                                                    | Suppressed | Suppressed |
| E86         | Volume depletion                                                                                                           | Suppressed | Suppressed |
| E87         | Other disorders of fluid, electrolyte and acid-base balance                                                                | Suppressed | Suppressed |
| F32         | Depressive episode                                                                                                         | Suppressed | Suppressed |

| ICD-10 code | Label                                                                                                                                                                                     | Number     | %          |
|-------------|-------------------------------------------------------------------------------------------------------------------------------------------------------------------------------------------|------------|------------|
| G08         | Intracranial and intraspinal phlebitis and thrombophlebitis                                                                                                                               | Suppressed | Suppressed |
| I10         | Essential (primary) hypertension                                                                                                                                                          | Suppressed | Suppressed |
| I46         | Cardiac arrest                                                                                                                                                                            | Suppressed | Suppressed |
| I74         | Arterial embolism and thrombosis                                                                                                                                                          | Suppressed | Suppressed |
| J90         | Pleural effusion, not elsewhere classified                                                                                                                                                | Suppressed | Suppressed |
| J96         | Respiratory failure, not elsewhere classified                                                                                                                                             | Suppressed | Suppressed |
| K72         | Hepatic failure, not elsewhere classified                                                                                                                                                 | Suppressed | Suppressed |
| O15         | Eclampsia                                                                                                                                                                                 | Suppressed | Suppressed |
| Q28         | Other congenital malformations of circulatory system                                                                                                                                      | Suppressed | Suppressed |
| R56         | Convulsions, not elsewhere classified                                                                                                                                                     | Suppressed | Suppressed |
| R68         | Other general symptoms and signs                                                                                                                                                          | Suppressed | Suppressed |
| R99         | Other ill-defined and unspecified causes of mortality                                                                                                                                     | Suppressed | Suppressed |
| S31         | Open wound of abdomen, lower back and pelvis                                                                                                                                              | Suppressed | Suppressed |
| T43         | Poisoning by psychotropic drugs, not elsewhere classified                                                                                                                                 | Suppressed | Suppressed |
| T50         | Poisoning by diuretics and other and unspecified drugs, medicaments and biological substances                                                                                             | Suppressed | Suppressed |
| T82         | Complications of cardiac and vascular prosthetic devices, implants and grafts                                                                                                             | Suppressed | Suppressed |
| X89         | Assault by other specified chemicals and noxious substances                                                                                                                               | Suppressed | Suppressed |
| Y83         | Surgical operation and other surgical procedures as the cause of abnormal reaction of the patient, or of later complication, without mention of misadventure at the time of the procedure | Suppressed | Suppressed |
| O883        | Obstetric pyaemic and septic embolism                                                                                                                                                     | Suppressed | Suppressed |
| O880        | Obstetric air embolism                                                                                                                                                                    | Suppressed | Suppressed |
|             | <b>Total</b>                                                                                                                                                                              | <b>482</b> | <b>100</b> |

**Table S3. Any cause of death from 43 to 365 days of delivery among women who had a livebirth or stillbirth in CIHI and a death record in ORGD.** Cause of death is ranked according to the 3-digit ICD-10 code (4-digits for amniotic fluid embolism). Each case may have had more one cause of death, so the total count may exceed the number of cases. Suppression is required at 5 or fewer counts.

| ICD-10 code | Label                                                                                                                                                                                     | Number | %   |
|-------------|-------------------------------------------------------------------------------------------------------------------------------------------------------------------------------------------|--------|-----|
| T71         | Asphyxiation                                                                                                                                                                              | 48     | 5.1 |
| X70         | Intentional self-harm by hanging, strangulation and suffocation                                                                                                                           | 34     | 3.6 |
| C79         | Secondary malignant neoplasm of other sites                                                                                                                                               | 24     | 2.5 |
| X42         | Accidental poisoning by and exposure to narcotics and psychodysleptics [hallucinogens], not elsewhere classified                                                                          | 22     | 2.3 |
| O96         | Death from any obstetric cause occurring more than 42 days but less than one year after delivery                                                                                          | 19     | 2.0 |
| C50         | Malignant neoplasm of breast                                                                                                                                                              | 18     | 1.9 |
| T40         | Poisoning by narcotics and psychodysleptics [hallucinogens]                                                                                                                               | 18     | 1.9 |
| I49         | Other cardiac arrhythmias                                                                                                                                                                 | 17     | 1.8 |
| C92         | Myeloid leukaemia                                                                                                                                                                         | 16     | 1.7 |
| C34         | Malignant neoplasm of bronchus and lung                                                                                                                                                   | 14     | 1.5 |
| V89         | Motor- or nonmotor-vehicle accident, type of vehicle unspecified                                                                                                                          | 14     | 1.5 |
| A41         | Other septicaemia                                                                                                                                                                         | 13     | 1.4 |
| F19         | Mental and behavioural disorders due to multiple drug use and use of other psychoactive substances                                                                                        | 13     | 1.4 |
| X00         | Exposure to uncontrolled fire in building or structure                                                                                                                                    | 13     | 1.4 |
| W76         | Other accidental hanging and strangulation                                                                                                                                                | 12     | 1.3 |
| C71         | Malignant neoplasm of brain                                                                                                                                                               | 10     | 1.1 |
| E14         | Unspecified diabetes mellitus                                                                                                                                                             | 10     | 1.1 |
| G93         | Other disorders of brain                                                                                                                                                                  | 10     | 1.1 |
| I26         | Pulmonary embolism                                                                                                                                                                        | 10     | 1.1 |
| I51         | Complications and ill-defined descriptions of heart disease                                                                                                                               | 10     | 1.1 |
| I60         | Subarachnoid haemorrhage                                                                                                                                                                  | 10     | 1.1 |
| J18         | Pneumonia, organism unspecified                                                                                                                                                           | 10     | 1.1 |
| T14         | Injury of unspecified body region                                                                                                                                                         | 10     | 1.1 |
| T50         | Poisoning by diuretics and other and unspecified drugs, medicaments and biological substances                                                                                             | 10     | 1.1 |
| S09         | Other and unspecified injuries of head                                                                                                                                                    | 9      | 1.0 |
| F53         | Mental and behavioural disorders associated with the puerperium, not elsewhere classified                                                                                                 | 8      | 0.9 |
| I46         | Cardiac arrest                                                                                                                                                                            | 8      | 0.9 |
| T07         | Unspecified multiple injuries                                                                                                                                                             | 8      | 0.9 |
| C78         | Secondary malignant neoplasm of respiratory and digestive organs                                                                                                                          | 7      | 0.7 |
| C80         | Malignant neoplasm without specification of site                                                                                                                                          | 7      | 0.7 |
| M32         | Systemic lupus erythematosus                                                                                                                                                              | 7      | 0.7 |
| Y83         | Surgical operation and other surgical procedures as the cause of abnormal reaction of the patient, or of later complication, without mention of misadventure at the time of the procedure | 7      | 0.7 |

| ICD-10 code | Label                                                                                                                                       | Number     | %          |
|-------------|---------------------------------------------------------------------------------------------------------------------------------------------|------------|------------|
| C43         | Malignant melanoma of skin                                                                                                                  | 6          | 0.6        |
| C53         | Malignant neoplasm of cervix uteri                                                                                                          | 6          | 0.6        |
| D43         | Neoplasm of uncertain or unknown behaviour of brain and central nervous system                                                              | 6          | 0.6        |
| I21         | Acute myocardial infarction                                                                                                                 | 6          | 0.6        |
| I25         | Chronic ischaemic heart disease                                                                                                             | 6          | 0.6        |
| K85         | Acute pancreatitis                                                                                                                          | 6          | 0.6        |
| R97         | R97                                                                                                                                         | 6          | 0.6        |
| R99         | Other ill-defined and unspecified causes of mortality                                                                                       | 6          | 0.6        |
| T51         | Toxic effect of alcohol                                                                                                                     | 6          | 0.6        |
| T59         | Toxic effect of other gases, fumes and vapours                                                                                              | 6          | 0.6        |
| V43         | Car occupant injured in collision with car, pick-up truck or van                                                                            | 6          | 0.6        |
| V87         | Traffic accident of specified type but victim's mode of transport unknown                                                                   | 6          | 0.6        |
| X41         | Accidental poisoning by and exposure to antiepileptic, sedative-hypnotic, antiparkinsonism and psychotropic drugs, not elsewhere classified | 6          | 0.6        |
| X44         | Accidental poisoning by and exposure to other and unspecified drugs, medicaments and biological substances                                  | 6          | 0.6        |
| X45         | Accidental poisoning by and exposure to alcohol                                                                                             | 6          | 0.6        |
| Y00         | Assault by blunt object                                                                                                                     | 6          | 0.6        |
| C16         | Malignant neoplasm of stomach                                                                                                               | Suppressed | Suppressed |
| C85         | Other and unspecified types of non-Hodgkin's lymphoma                                                                                       | Suppressed | Suppressed |
| I33         | Acute and subacute endocarditis                                                                                                             | Suppressed | Suppressed |
| I42         | Cardiomyopathy                                                                                                                              | Suppressed | Suppressed |
| I63         | Cerebral infarction                                                                                                                         | Suppressed | Suppressed |
| J96         | Respiratory failure, not elsewhere classified                                                                                               | Suppressed | Suppressed |
| K55         | Vascular disorders of intestine                                                                                                             | Suppressed | Suppressed |
| R57         | Shock, not elsewhere classified                                                                                                             | Suppressed | Suppressed |
| T75         | Effects of other external causes                                                                                                            | Suppressed | Suppressed |
| C84         | Peripheral and cutaneous T-cell lymphomas                                                                                                   | Suppressed | Suppressed |
| E78         | Disorders of lipoprotein metabolism and other lipidaemias                                                                                   | Suppressed | Suppressed |
| F10         | Mental and behavioural disorders due to use of alcohol                                                                                      | Suppressed | Suppressed |
| F32         | Depressive episode                                                                                                                          | Suppressed | Suppressed |
| I34         | Nonrheumatic mitral valve disorders                                                                                                         | Suppressed | Suppressed |
| I72         | Other aneurysm                                                                                                                              | Suppressed | Suppressed |
| K72         | Hepatic failure, not elsewhere classified                                                                                                   | Suppressed | Suppressed |
| O88         | Obstetric embolism                                                                                                                          | Suppressed | Suppressed |
| O90         | Complications of the puerperium, not elsewhere classified                                                                                   | Suppressed | Suppressed |
| R09         | Other symptoms and signs involving the circulatory and respiratory systems                                                                  | Suppressed | Suppressed |
| R58         | Haemorrhage, not elsewhere classified                                                                                                       | Suppressed | Suppressed |
| R68         | Other general symptoms and signs                                                                                                            | Suppressed | Suppressed |
| S06         | Intracranial injury                                                                                                                         | Suppressed | Suppressed |

| ICD-10 code | Label                                                                                                                                                             | Number     | %          |
|-------------|-------------------------------------------------------------------------------------------------------------------------------------------------------------------|------------|------------|
| S11         | Open wound of neck                                                                                                                                                | Suppressed | Suppressed |
| S29         | Other and unspecified injuries of thorax                                                                                                                          | Suppressed | Suppressed |
| T17         | Foreign body in respiratory tract                                                                                                                                 | Suppressed | Suppressed |
| T81         | Complications of procedures, not elsewhere classified                                                                                                             | Suppressed | Suppressed |
| T86         | Failure and rejection of transplanted organs and tissues                                                                                                          | Suppressed | Suppressed |
| V03         | Pedestrian injured in collision with car, pick-up truck or van                                                                                                    | Suppressed | Suppressed |
| V86         | Occupant of special all-terrain or other motor vehicle designed primarily for off-road use, injured in transport accident                                         | Suppressed | Suppressed |
| X74         | Intentional self-harm by other and unspecified firearm discharge                                                                                                  | Suppressed | Suppressed |
| X80         | Intentional self-harm by jumping from a high place                                                                                                                | Suppressed | Suppressed |
| X91         | Assault by hanging, strangulation and suffocation                                                                                                                 | Suppressed | Suppressed |
| X99         | Assault by sharp object                                                                                                                                           | Suppressed | Suppressed |
| Y21         | Drowning and submersion, undetermined intent                                                                                                                      | Suppressed | Suppressed |
| C26         | Malignant neoplasm of other and ill-defined digestive organs                                                                                                      | Suppressed | Suppressed |
| C56         | Malignant neoplasm of ovary                                                                                                                                       | Suppressed | Suppressed |
| C95         | Leukaemia of unspecified cell type                                                                                                                                | Suppressed | Suppressed |
| D57         | Sickle-cell disorders                                                                                                                                             | Suppressed | Suppressed |
| D68         | Other coagulation defects                                                                                                                                         | Suppressed | Suppressed |
| E66         | Obesity                                                                                                                                                           | Suppressed | Suppressed |
| E87         | Other disorders of fluid, electrolyte and acid-base balance                                                                                                       | Suppressed | Suppressed |
| F14         | Mental and behavioural disorders due to use of cocaine                                                                                                            | Suppressed | Suppressed |
| G00         | Bacterial meningitis, not elsewhere classified                                                                                                                    | Suppressed | Suppressed |
| G40         | Epilepsy                                                                                                                                                          | Suppressed | Suppressed |
| I61         | Intracerebral haemorrhage                                                                                                                                         | Suppressed | Suppressed |
| I67         | Other cerebrovascular diseases                                                                                                                                    | Suppressed | Suppressed |
| J45         | Asthma                                                                                                                                                            | Suppressed | Suppressed |
| J80         | Adult respiratory distress syndrome                                                                                                                               | Suppressed | Suppressed |
| M06         | Other rheumatoid arthritis                                                                                                                                        | Suppressed | Suppressed |
| M72         | Fibroblastic disorders                                                                                                                                            | Suppressed | Suppressed |
| O99         | Other maternal diseases classifiable elsewhere but complicating pregnancy, childbirth and the puerperium                                                          | Suppressed | Suppressed |
| Q05         | Spina bifida                                                                                                                                                      | Suppressed | Suppressed |
| Q21         | Congenital malformations of cardiac septa                                                                                                                         | Suppressed | Suppressed |
| Q24         | Other congenital malformations of heart                                                                                                                           | Suppressed | Suppressed |
| T42         | Poisoning by antiepileptic, sedative-hypnotic and antiparkinsonism drugs                                                                                          | Suppressed | Suppressed |
| T43         | Poisoning by psychotropic drugs, not elsewhere classified                                                                                                         | Suppressed | Suppressed |
| T58         | Toxic effect of carbon monoxide                                                                                                                                   | Suppressed | Suppressed |
| V49         | Car occupant injured in other and unspecified transport accidents                                                                                                 | Suppressed | Suppressed |
| X59         | Exposure to unspecified factor                                                                                                                                    | Suppressed | Suppressed |
| Y84         | Other medical procedures as the cause of abnormal reaction of the patient, or of later complication, without mention of misadventure at the time of the procedure | Suppressed | Suppressed |
| A87         | Viral meningitis                                                                                                                                                  | Suppressed | Suppressed |

| ICD-10 code | Label                                                                            | Number     | %          |
|-------------|----------------------------------------------------------------------------------|------------|------------|
| B01         | Varicella [chickenpox]                                                           | Suppressed | Suppressed |
| C18         | Malignant neoplasm of colon                                                      | Suppressed | Suppressed |
| C25         | Malignant neoplasm of pancreas                                                   | Suppressed | Suppressed |
| C49         | Malignant neoplasm of other connective and soft tissue                           | Suppressed | Suppressed |
| C64         | Malignant neoplasm of kidney, except renal pelvis                                | Suppressed | Suppressed |
| C67         | Malignant neoplasm of bladder                                                    | Suppressed | Suppressed |
| C81         | Hodgkin's disease                                                                | Suppressed | Suppressed |
| C91         | Lymphoid leukaemia                                                               | Suppressed | Suppressed |
| D70         | Agranulocytosis                                                                  | Suppressed | Suppressed |
| D76         | Certain diseases involving lymphoreticular tissue and reticulohistiocytic system | Suppressed | Suppressed |
| E10         | Type 1 Diabetes mellitus                                                         | Suppressed | Suppressed |
| F31         | Bipolar affective disorder                                                       | Suppressed | Suppressed |
| G04         | Encephalitis, myelitis and encephalomyelitis                                     | Suppressed | Suppressed |
| G91         | Hydrocephalus                                                                    | Suppressed | Suppressed |
| I11         | Hypertensive heart disease                                                       | Suppressed | Suppressed |
| I27         | Other pulmonary heart diseases                                                   | Suppressed | Suppressed |
| I50         | Heart failure                                                                    | Suppressed | Suppressed |
| I71         | Aortic aneurysm and dissection                                                   | Suppressed | Suppressed |
| I74         | Arterial embolism and thrombosis                                                 | Suppressed | Suppressed |
| J46         | J46                                                                              | Suppressed | Suppressed |
| K46         | Unspecified abdominal hernia                                                     | Suppressed | Suppressed |
| K65         | Peritonitis                                                                      | Suppressed | Suppressed |
| K80         | Cholelithiasis                                                                   | Suppressed | Suppressed |
| L03         | Cellulitis                                                                       | Suppressed | Suppressed |
| N13         | Obstructive and reflux uropathy                                                  | Suppressed | Suppressed |
| N19         | Unspecified renal failure                                                        | Suppressed | Suppressed |
| N39         | Other disorders of urinary system                                                | Suppressed | Suppressed |
| O03         | Spontaneous abortion                                                             | Suppressed | Suppressed |
| O08         | Complications following abortion and ectopic and molar pregnancy                 | Suppressed | Suppressed |
| O26         | Maternal care for other conditions predominantly related to pregnancy            | Suppressed | Suppressed |
| Q03         | Congenital hydrocephalus                                                         | Suppressed | Suppressed |
| Q85         | Phakomatoses, not elsewhere classified                                           | Suppressed | Suppressed |
| R04         | Haemorrhage from respiratory passages                                            | Suppressed | Suppressed |
| S01         | Open wound of head                                                               | Suppressed | Suppressed |
| S02         | Fracture of skull and facial bones                                               | Suppressed | Suppressed |
| S12         | Fracture of neck                                                                 | Suppressed | Suppressed |
| S19         | Other and unspecified injuries of neck                                           | Suppressed | Suppressed |
| S36         | Injury of intra-abdominal organs                                                 | Suppressed | Suppressed |
| S39         | Other and unspecified injuries of abdomen, lower back and pelvis                 | Suppressed | Suppressed |
| T09         | Other injuries of spine and trunk, level unspecified                             | Suppressed | Suppressed |
| T68         | Hypothermia                                                                      | Suppressed | Suppressed |



| ICD-10 code | Label                                                                                                                | Number     | %          |
|-------------|----------------------------------------------------------------------------------------------------------------------|------------|------------|
| T79         | Certain early complications of trauma, not elsewhere classified                                                      | Suppressed | Suppressed |
| V13         | Pedal cyclist injured in collision with car, pick-up truck or van                                                    | Suppressed | Suppressed |
| V19         | Pedal cyclist injured in other and unspecified transport accidents                                                   | Suppressed | Suppressed |
| V47         | Car occupant injured in collision with fixed or stationary object                                                    | Suppressed | Suppressed |
| V48         | Car occupant injured in noncollision transport accident                                                              | Suppressed | Suppressed |
| W19         | Unspecified fall                                                                                                     | Suppressed | Suppressed |
| W80         | Inhalation and ingestion of other objects causing obstruction of respiratory tract                                   | Suppressed | Suppressed |
| X64         | Intentional self-poisoning by and exposure to other and unspecified drugs, medicaments and biological substances     | Suppressed | Suppressed |
| X67         | Intentional self-poisoning by and exposure to other gases and vapours                                                | Suppressed | Suppressed |
| X78         | Intentional self-harm by sharp object                                                                                | Suppressed | Suppressed |
| X81         | Intentional self-harm by jumping or lying before moving object                                                       | Suppressed | Suppressed |
| X84         | Intentional self-harm by unspecified means                                                                           | Suppressed | Suppressed |
| X95         | Assault by other and unspecified firearm discharge                                                                   | Suppressed | Suppressed |
| Y03         | Assault by crashing of motor vehicle                                                                                 | Suppressed | Suppressed |
| Y14         | Poisoning by and exposure to other and unspecified drugs, medicaments and biological substances, undetermined intent | Suppressed | Suppressed |
| Y85         | Sequelae of transport accidents                                                                                      | Suppressed | Suppressed |
| A48         | Other bacterial diseases, not elsewhere classified                                                                   | Suppressed | Suppressed |
| B59         | Pneumocystosis                                                                                                       | Suppressed | Suppressed |
| C22         | Malignant neoplasm of liver and intrahepatic bile ducts                                                              | Suppressed | Suppressed |
| C47         | Malignant neoplasm of peripheral nerves and autonomic nervous system                                                 | Suppressed | Suppressed |
| D32         | Benign neoplasm of meninges                                                                                          | Suppressed | Suppressed |
| D33         | Benign neoplasm of brain and other parts of central nervous system                                                   | Suppressed | Suppressed |
| D36         | Benign neoplasm of other and unspecified sites                                                                       | Suppressed | Suppressed |
| D61         | Other aplastic anaemias                                                                                              | Suppressed | Suppressed |
| D65         | Disseminated intravascular coagulation [defibrination syndrome]                                                      | Suppressed | Suppressed |
| E03         | Other hypothyroidism                                                                                                 | Suppressed | Suppressed |
| F11         | Mental and behavioural disorders due to use of opioids                                                               | Suppressed | Suppressed |
| F17         | Mental and behavioural disorders due to use of tobacco                                                               | Suppressed | Suppressed |
| F23         | Acute and transient psychotic disorders                                                                              | Suppressed | Suppressed |
| F29         | Unspecified nonorganic psychosis                                                                                     | Suppressed | Suppressed |
| G41         | Status epilepticus                                                                                                   | Suppressed | Suppressed |
| I05         | Rheumatic mitral valve diseases                                                                                      | Suppressed | Suppressed |
| I07         | Rheumatic tricuspid valve diseases                                                                                   | Suppressed | Suppressed |
| I10         | Essential (primary) hypertension                                                                                     | Suppressed | Suppressed |
| I20         | Angina pectoris                                                                                                      | Suppressed | Suppressed |
| I31         | Other diseases of pericardium                                                                                        | Suppressed | Suppressed |
| I38         | Endocarditis, valve unspecified                                                                                      | Suppressed | Suppressed |
| I40         | Acute myocarditis                                                                                                    | Suppressed | Suppressed |

| ICD-10 code | Label                                                                                     | Number     | %          |
|-------------|-------------------------------------------------------------------------------------------|------------|------------|
| I47         | Paroxysmal tachycardia                                                                    | Suppressed | Suppressed |
| I62         | Other nontraumatic intracranial haemorrhage                                               | Suppressed | Suppressed |
| I64         | Stroke, not specified as haemorrhage or infarction                                        | Suppressed | Suppressed |
| I80         | Phlebitis and thrombophlebitis                                                            | Suppressed | Suppressed |
| J15         | Bacterial pneumonia, not elsewhere classified                                             | Suppressed | Suppressed |
| J69         | Pneumonitis due to solids and liquids                                                     | Suppressed | Suppressed |
| J81         | Pulmonary oedema                                                                          | Suppressed | Suppressed |
| J94         | Other pleural conditions                                                                  | Suppressed | Suppressed |
| K29         | Gastritis and duodenitis                                                                  | Suppressed | Suppressed |
| K74         | Fibrosis and cirrhosis of liver                                                           | Suppressed | Suppressed |
| L89         | Decubitus ulcer                                                                           | Suppressed | Suppressed |
| L93         | Lupus erythematosus                                                                       | Suppressed | Suppressed |
| N17         | Acute renal failure                                                                       | Suppressed | Suppressed |
| N26         | Unspecified contracted kidney                                                             | Suppressed | Suppressed |
| O75         | Other complications of labour and delivery, not elsewhere classified                      | Suppressed | Suppressed |
| Q86         | Congenital malformation syndromes due to known exogenous causes, not elsewhere classified | Suppressed | Suppressed |
| R00         | Abnormalities of heart beat                                                               | Suppressed | Suppressed |
| R10         | Abdominal and pelvic pain                                                                 | Suppressed | Suppressed |
| R11         | Nausea and vomiting                                                                       | Suppressed | Suppressed |
| R18         | Ascites                                                                                   | Suppressed | Suppressed |
| R40         | Somnolence, stupor and coma                                                               | Suppressed | Suppressed |
| R50         | Fever of unknown origin                                                                   | Suppressed | Suppressed |
| R52         | Pain, not elsewhere classified                                                            | Suppressed | Suppressed |
| R59         | Enlarged lymph nodes                                                                      | Suppressed | Suppressed |
| R94         | Abnormal results of function studies                                                      | Suppressed | Suppressed |
| S18         | Traumatic amputation at neck level                                                        | Suppressed | Suppressed |
| S21         | Open wound of thorax                                                                      | Suppressed | Suppressed |
| S22         | Fracture of rib(s), sternum and thoracic spine                                            | Suppressed | Suppressed |
| S26         | Injury of heart                                                                           | Suppressed | Suppressed |
| S27         | Injury of other and unspecified intrathoracic organs                                      | Suppressed | Suppressed |
| S32         | Fracture of lumbar spine and pelvis                                                       | Suppressed | Suppressed |
| T02         | Fractures involving multiple body regions                                                 | Suppressed | Suppressed |
| T45         | Poisoning by primarily systemic and haematological agents, not elsewhere classified       | Suppressed | Suppressed |
| T82         | Complications of cardiac and vascular prosthetic devices, implants and grafts             | Suppressed | Suppressed |
| T84         | Complications of internal orthopaedic prosthetic devices, implants and grafts             | Suppressed | Suppressed |
| T90         | Sequelae of injuries of head                                                              | Suppressed | Suppressed |
| W18         | Other fall on same level                                                                  | Suppressed | Suppressed |
| W49         | Exposure to other and unspecified inanimate mechanical forces                             | Suppressed | Suppressed |
| W65         | Drowning and submersion while in bath-tub                                                 | Suppressed | Suppressed |

| ICD-10 code  | Label                                                                                    | Number     | %          |
|--------------|------------------------------------------------------------------------------------------|------------|------------|
| X31          | Exposure to excessive natural cold                                                       | Suppressed | Suppressed |
| Y42          | Hormones and their synthetic substitutes and antagonists, not elsewhere classified       | Suppressed | Suppressed |
| Y60          | Unintentional cut, puncture, perforation or haemorrhage during surgical and medical care | Suppressed | Suppressed |
| <b>Total</b> |                                                                                          | <b>945</b> | <b>100</b> |
